# Supplementary material
Source: PubMed Central journal article supplement (PMC4299257)
Supplement: pnas.201415038SI.pdf [file pnas.201415038SI.pdf]

# Supporting Information

Moore et al. 10.1073/pnas.1415038112

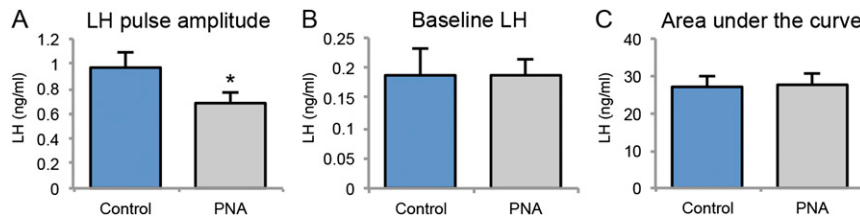

**Fig. 51.** Serial blood sampling of whole blood LH concentrations from control ( $n = 14$ ) and PNA ( $n = 19$ ) mice in diestrus at 6- to 10-min intervals for 2 h reveals that LH pulse amplitude (A) is significantly reduced by PNA treatment. No differences in mean baseline LH (B) and the area under the curve (C) were detected between control and PNA mice.

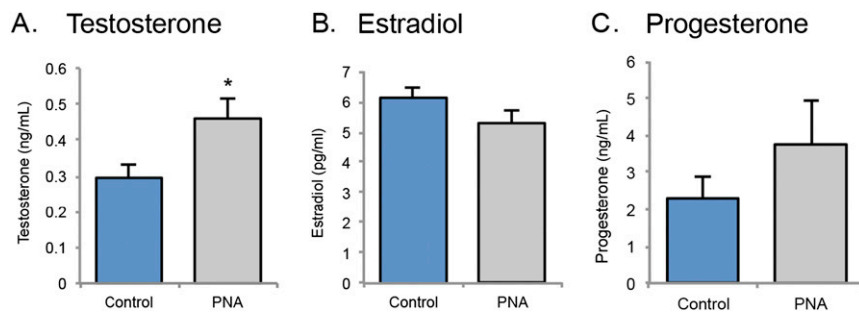

**Fig. 52.** (A) Plasma testosterone concentration is significantly increased in PNA mice ( $n = 17$ ) compared with controls ( $n = 17$ ). Reproduced with permission from ref. 1. (B) Serum estradiol concentration is not significantly different between control ( $n = 18$ ) and PNA mice ( $n = 18$ ) in diestrus. (C) Plasma progesterone concentration is not significantly different between control ( $n = 6$ ) and PNA ( $n = 5$ ) mice in diestrus.

1. Moore AM, Prescott M, Campbell RE (2013) Estradiol negative and positive feedback in a prenatal androgen-induced mouse model of polycystic ovarian syndrome. *Endocrinology* 154(2):796–806.







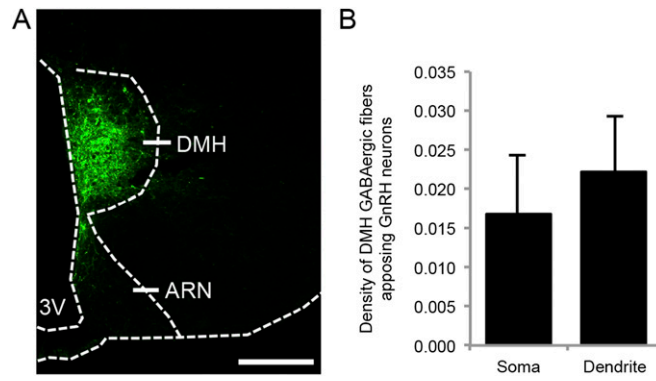

**Fig. 58.** (A) Injection of Ad-iZ/EGFPf 1 mm posterior to bregma, 0.3 mm lateral to bregma, and 5.2 mm ventral to dura induces EGFPf expression in GABAergic neurons of the DMH ( $n = 4$ ). (Scale bar, 0.5 mm.) (B) The density of closely apposed fibers from DMH GABAergic neurons to GnRH neurons in control injections.
